# Supplementary material
Source: HighWire-hosted journal article supplement (https://jnm.snmjournals.org/highwire/filestream/94667/field_highwire_adjunct_files/0/144394_Supplemental_Data.pdf)
Supplement: 144394_Supplemental_Data.pdf [file 144394_Supplemental_Data.pdf]

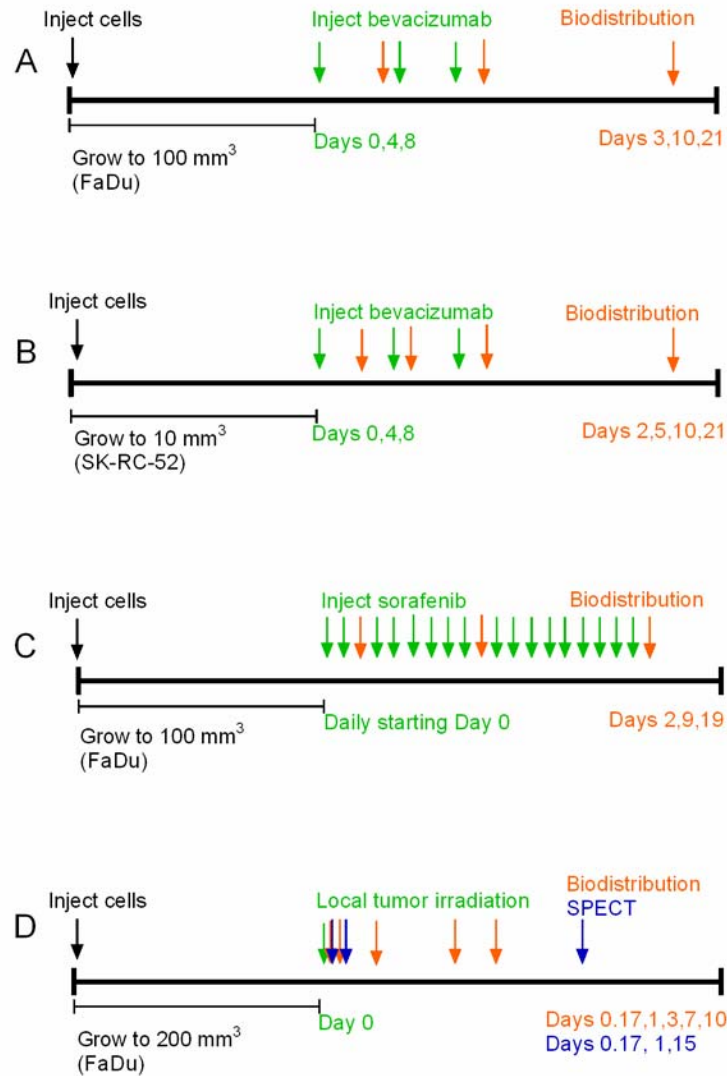

Supplemental Figure 1. Schedule of treatment regimes, biodistribution time points and SPECT imaging time points of mice bearing FaDu xenografts treated with bevacizumab (A), SK-RC-52 xenografts treated with bevacizumab (B), FaDu xenografts treated with sorafenib (C), or with local irradiation (D).
